# Supplementary material for: Lessons learnt from a rockfall time series analysis: data collection, statistical analysis, and applications
Source: Copernicus journal article supplement (doi:10.5194/nhess-23-3079-2023), 2023-09-20
Supplement: Supplementary file 1 [file nhess-23-3079-2023-supplement.pdf]

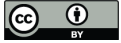

*Supplement of*

**Lessons learnt from a rockfall time series analysis:  
data collection, statistical analysis, and applications**

**Sandra Melzner et al.**

*Correspondence to:* Sandra Melzner ([office@geochange-consulting.com](mailto:office@geochange-consulting.com))

The copyright of individual parts of the supplement might differ from the article licence.

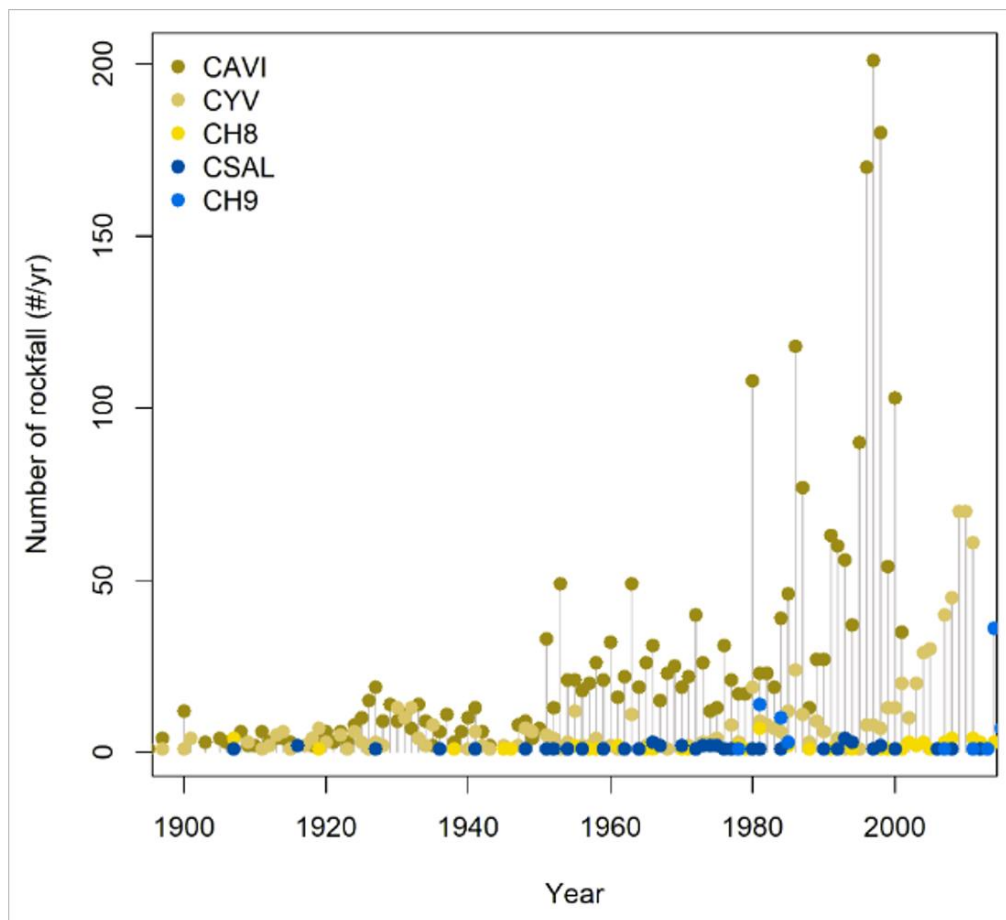

5 **Figure 2: Comparison of absolute number of rockfalls per year ( $N_j$ , (annual rockfall frequency) of five historical rockfall time series in Italy (red), Austria (green, purple and blue) and USA (orange).  $C_{YV}$  catalogue 1857-2011 (total number of rockfalls 887),  $C_{AVI}$  1489-2001 (total number of rockfalls 2612),  $C_{H8}$  1652- 2014 (total number of rockfalls 76),  $C_{SAL}$  1907-2016 (total number of rockfalls 53) and  $C_{H9}$  1978-2016 (total number of rockfalls 41).**

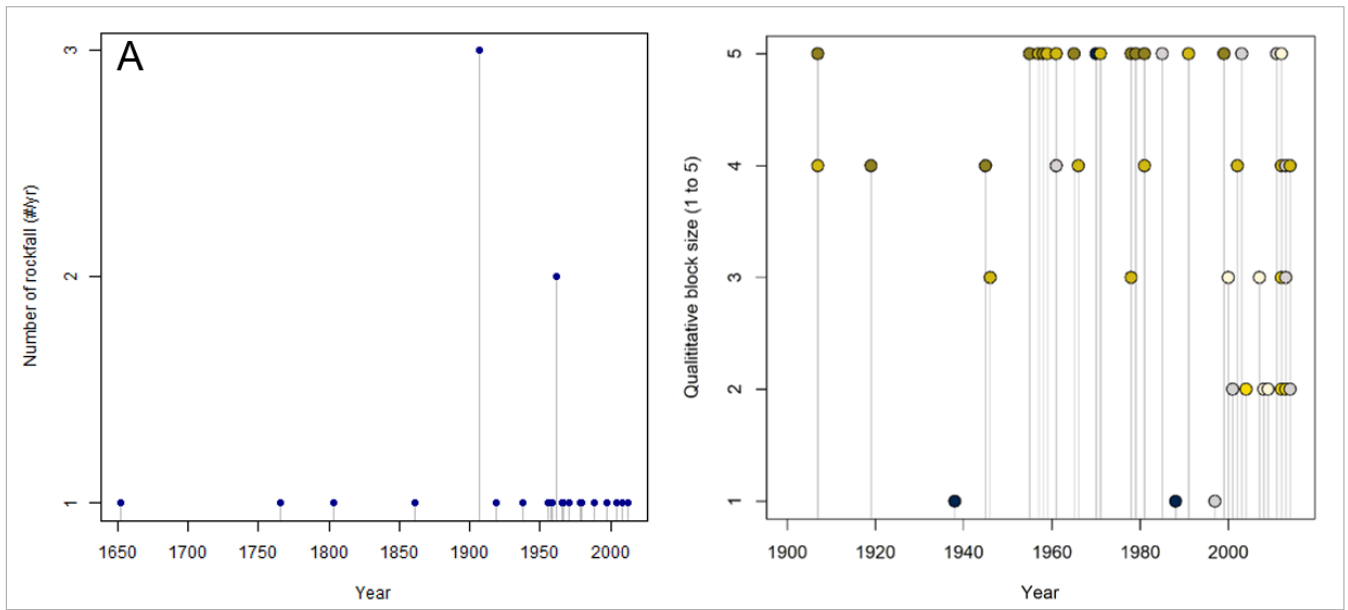

10

**Figure 3: Relationship between the representativeness of the rockfall time series  $C_{H8}$  (A) with respect to rockfall which resulted in consequences  $C_{H10}$  (B). Legend of fig. B: red points=very large intensity, orange points=large intensity, yellow points=medium intensity, green points= low intensity, blue points= fatality, rosa points= injury, grey points= no info, grey points= no damage.**

15

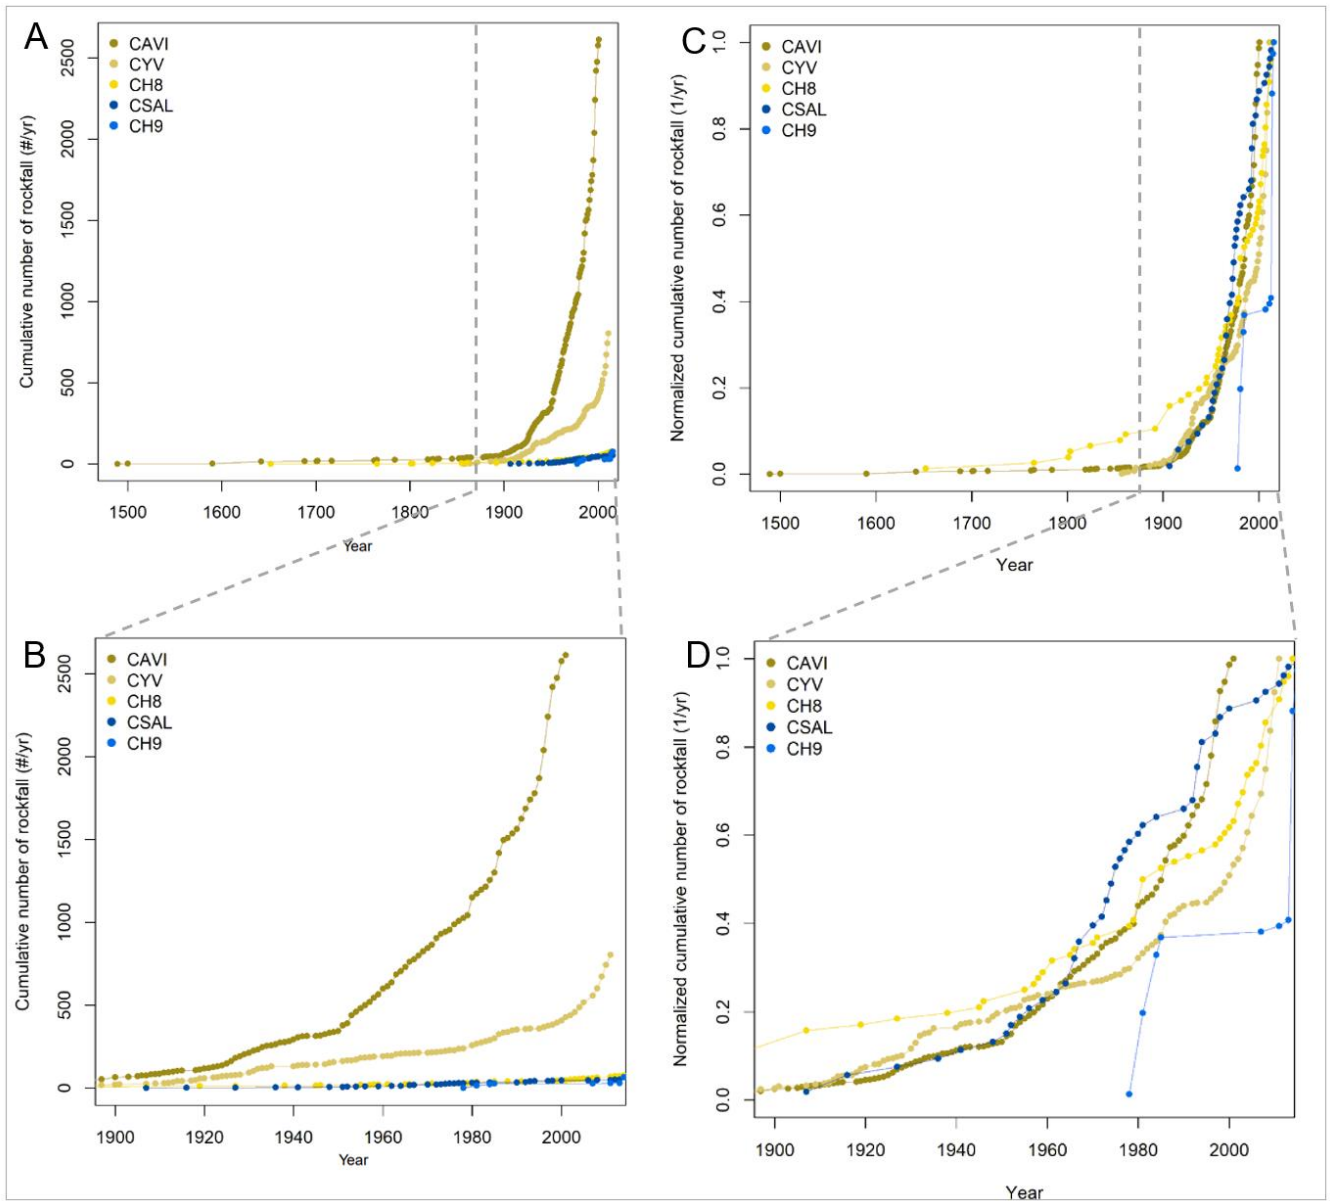

**Figure 4: Comparison of the cumulative number of rockfalls (A & B) and normalized cumulative number of rockfalls ( $N_{CR}$ , as a function of year, C & D) of the five historical rockfall catalogues  $C_{H8}$ ,  $C_{H9}$ ,  $C_{YV}$ ,  $C_{CAVI}$  and  $C_{SAL}$  from USA (orange curve), Italy (red curve) and Austria (dark and light blue and green curve).**

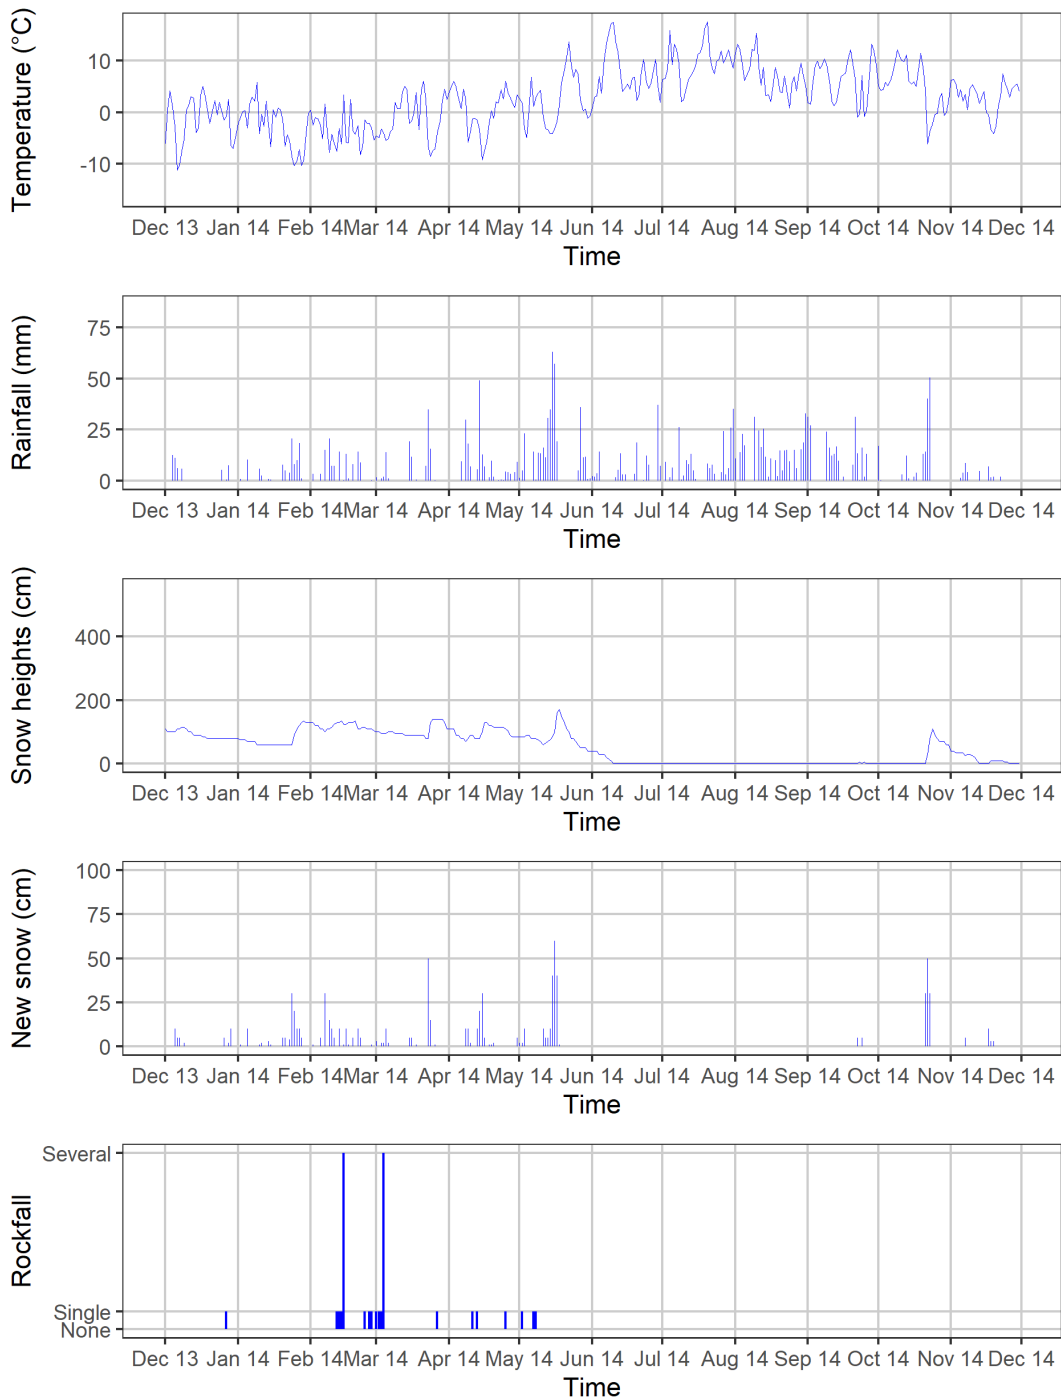

25 **Figure 7: Comparison of rockfalls with climatic conditions (new snow, snow heights, rainfall, temperature). Rockfall data collected by questionnaire/diary of an eye whiteness (a hunter) who is permanently living in this remote area. Data represents only high magnitude rockfalls always in the same rockfall source area (progressive failure).**

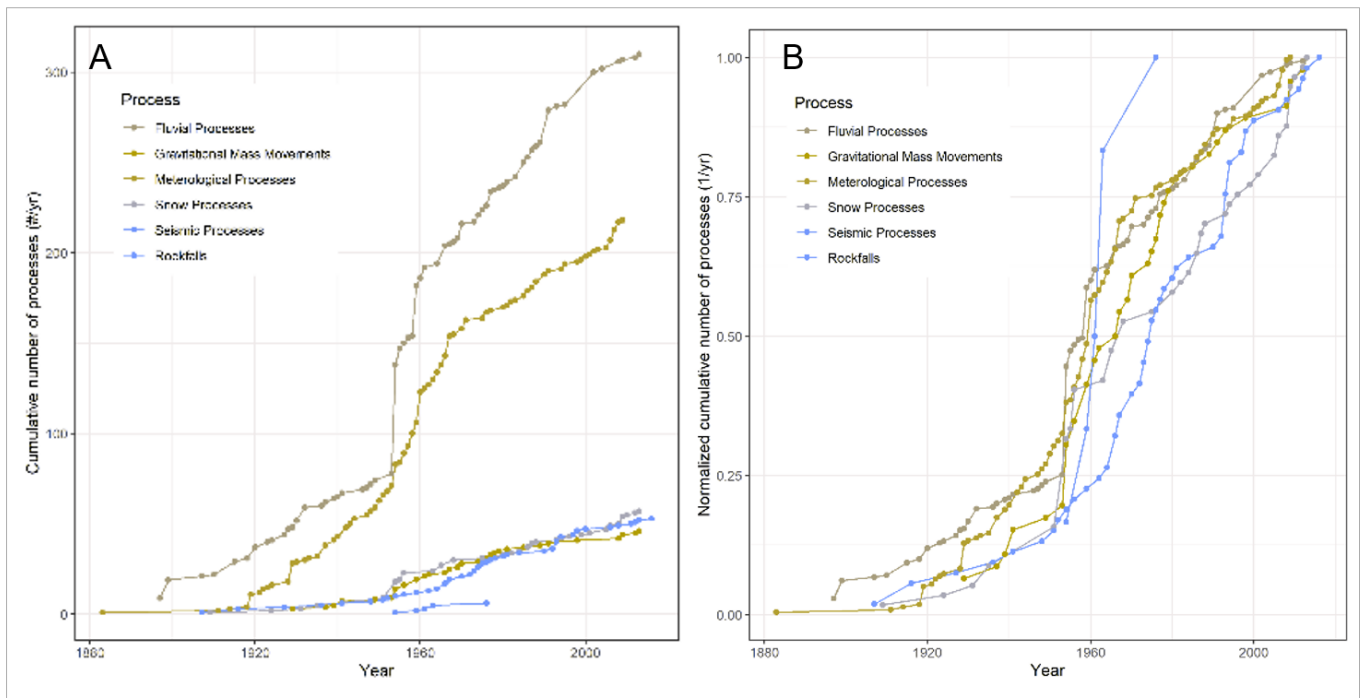

30 **Figure 8: Comparison of the cumulative number of different natural processes ( $N_{CR}$ , as a function of year) of the catalogue compiled by the review of the chronicles of the police department in Austria.**

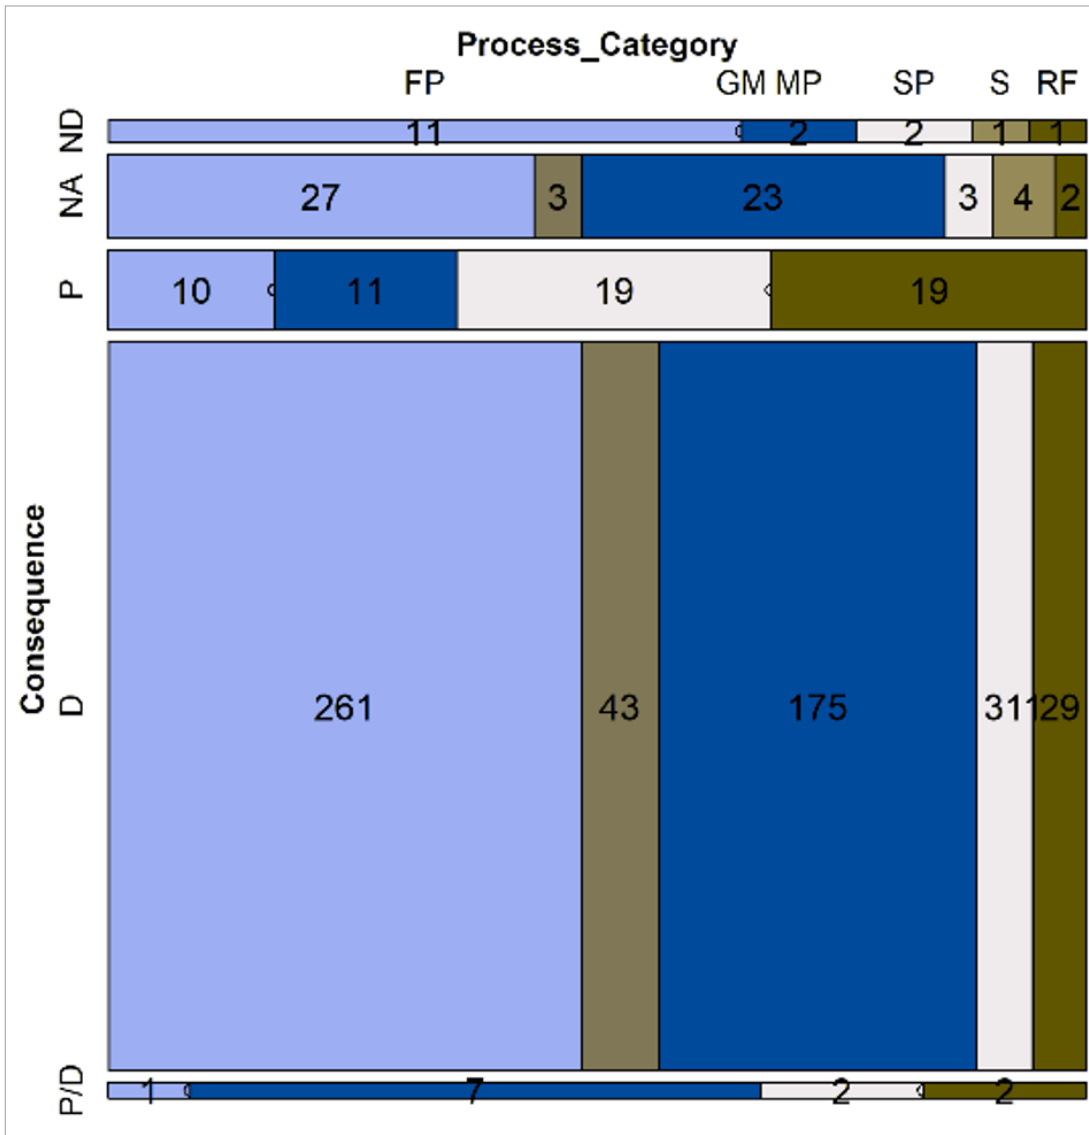

35 **Figure 9: Display of relationship consequences and natural processes of the catalogue compiled by the review of the chronicles of the police department in Austria. P/D= damage and fatalities, D= damage, P= fatalities, N/A=no information in the historical account, N/D= no consequences. FP= Fluvial processes (light blue), GM=Gravitational Mass Movement (brown), MP= Meteorologic Processes (blue), SP= Snow Processes (grey), S= Seismic Processes (red) and RF= Rockfall (green).**
